# Supplementary material for: Astrocytic YAP protects the optic nerve and retina in an experimental autoimmune encephalomyelitis model through TGF-β signaling
Source: PubMed Central journal article supplement (PMC8344002; doi:10.7150/thno.60031), 2021-07-25
Supplement: thnov11p8480s1.pdf [file thnov11p8480s1.pdf]

## Supplemental data

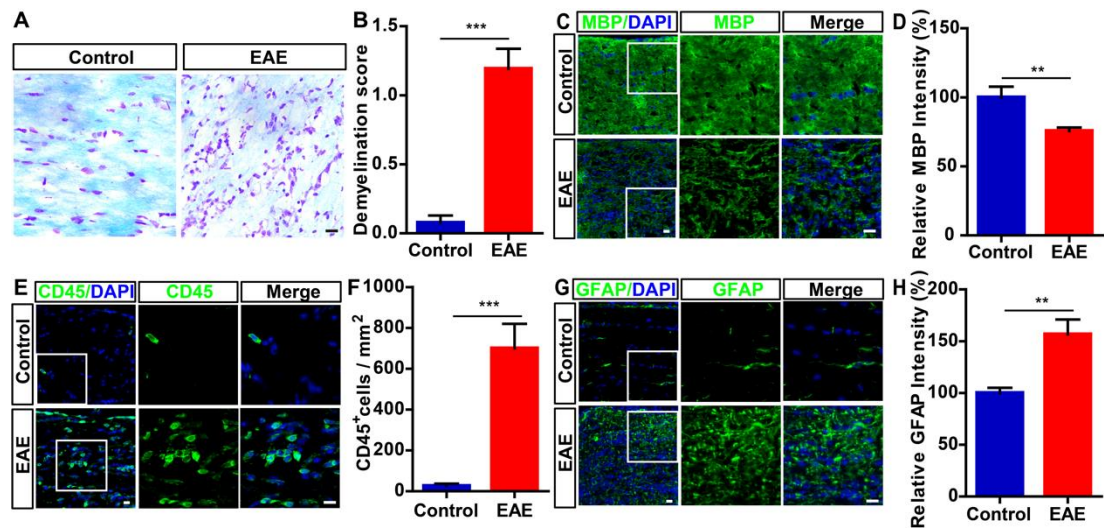

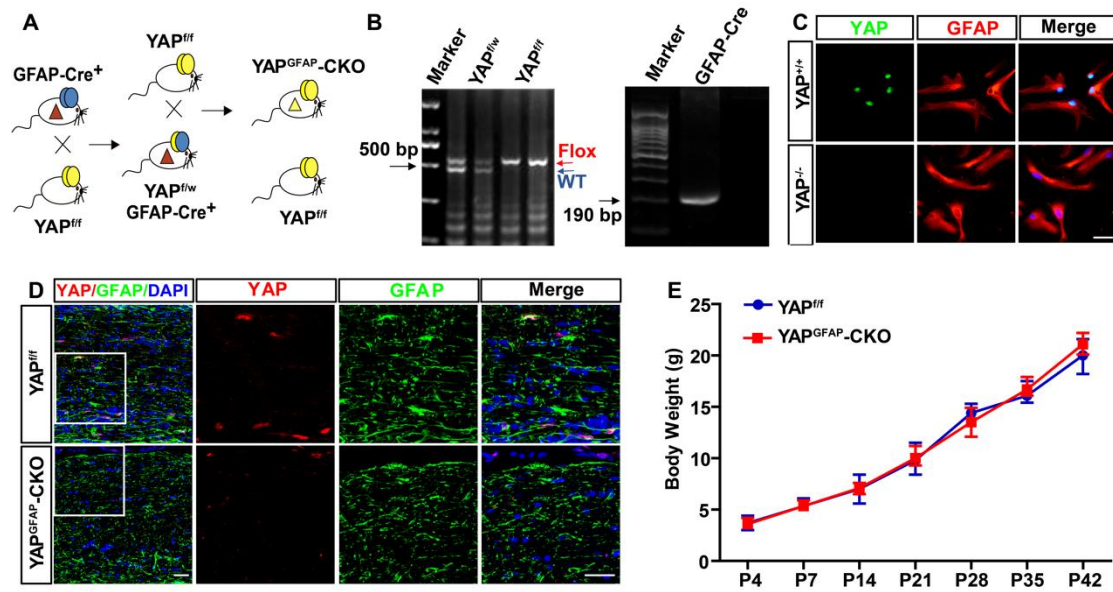

**Figure S2. Identification of YAP<sup>GFAP</sup>-CKO mice.** (A) The flow chart showed the process of obtaining YAP<sup>GFAP</sup>-CKO mice and their littermate control mice. (B) Genotyping was detected by agarose gel electrophoresis. (C) Double immunostaining of YAP (green) and GFAP (red) in cultured YAP<sup>+/+</sup> and YAP<sup>-/-</sup> astrocytes. (D) Double immunostaining of YAP (red) and GFAP (green) of optic nerve obtained from 2-month YAP<sup>f/f</sup> and YAP<sup>GFAP</sup>-CKO mice. (E) Body weight of YAP<sup>f/f</sup> and YAP<sup>GFAP</sup>-CKO mice at different developmental stages (n = 10 per group). Data were mean ± SEM, two-way ANOVA with Bonferroni's post-tests, compared with YAP<sup>f/f</sup> group. Scale bars, 20 μm.

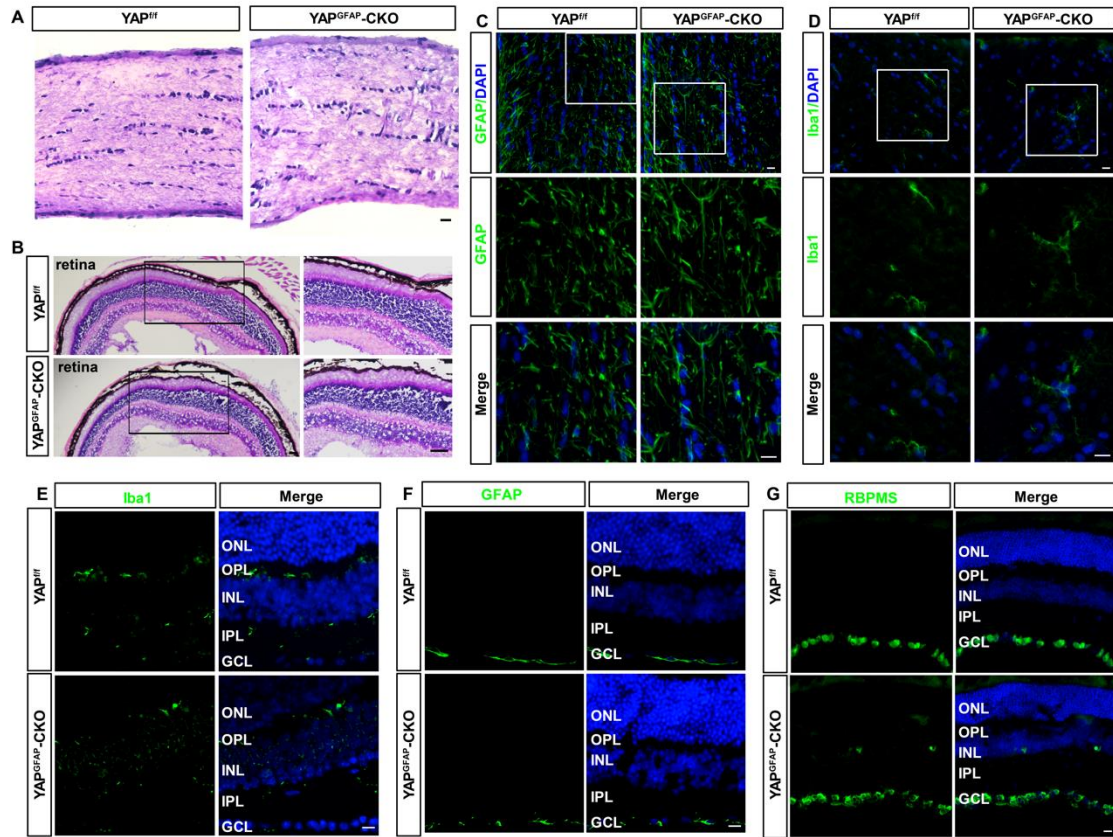

**Figure S3. Normal development of optic nerve and retina in  $YAP^{GFAP}$ -CKO mice.** (A-B) HE staining of optic nerve (A) or retina (B) obtained from 2-month  $YAP^{f/f}$  and  $YAP^{GFAP}$ -CKO mice. (C-D) Immunostaining of GFAP (green) (C) or Iba1 (green) (D) in the optic nerve of 2-month  $YAP^{f/f}$  and  $YAP^{GFAP}$ -CKO mice. (E-G) Immunostaining of Iba1 (green) (E), GFAP (green) (F) or RBPMS (green) (G) in the retina of 2-month  $YAP^{f/f}$  and  $YAP^{GFAP}$ -CKO mice. Images of selected regions (white squares) were shown at higher magnification. Scale bars, 20  $\mu$ m.

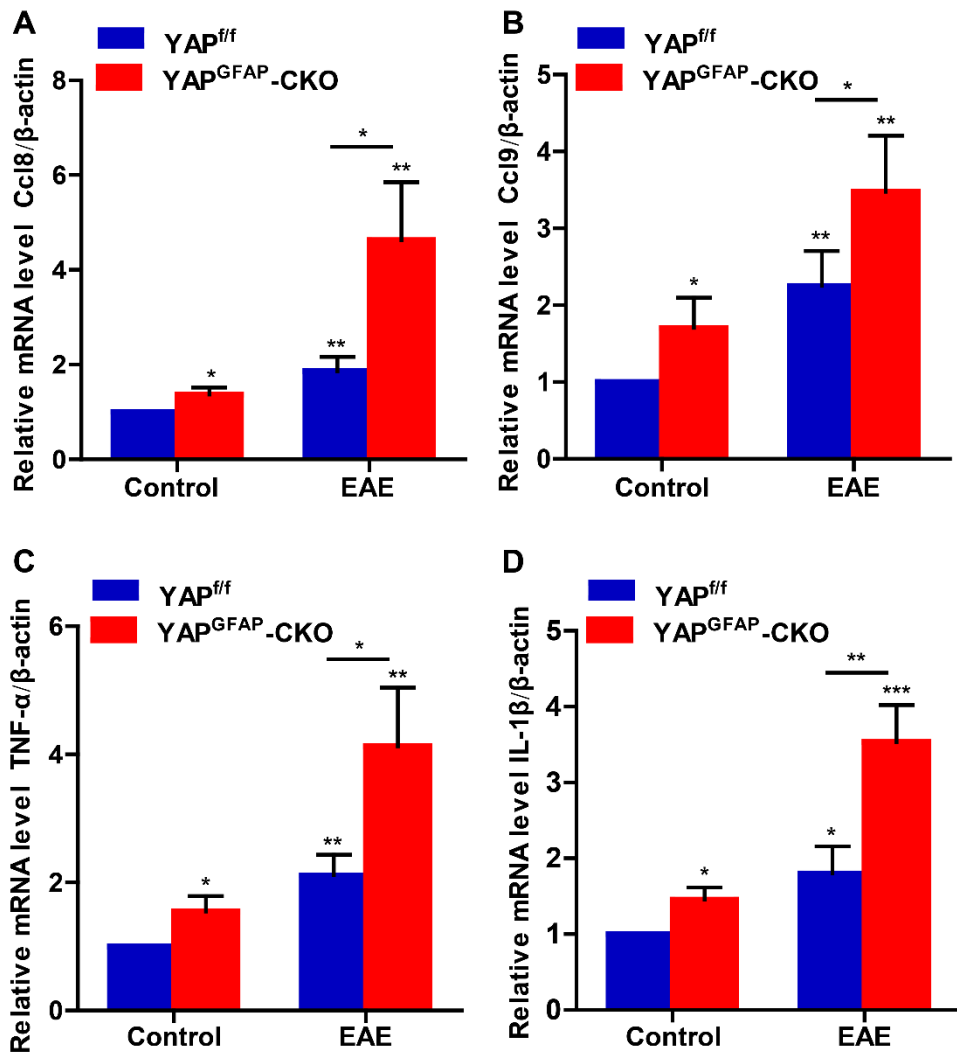

**Figure S4. Expression levels of some cytokines and chemokines in the optic nerve of YAP<sup>f/f</sup> and YAP<sup>GFAP</sup>-CKO mice, YAP<sup>f/f</sup> EAE and YAP<sup>GFAP</sup>-CKO EAE mice.** (A-D) qPCR analysis of the relative mRNA levels of Ccl8 (A), Ccl9 (B), TNF- $\alpha$  (C) and IL-1 $\beta$  (D) in the optic nerve of YAP<sup>f/f</sup> and YAP<sup>GFAP</sup>-CKO mice, YAP<sup>f/f</sup> EAE and YAP<sup>GFAP</sup>-CKO EAE mice (normalized to control group, n = 8 per group). Data were mean  $\pm$  SEM, two-way ANOVA with Bonferroni's post-tests, compared with YAP<sup>f/f</sup> group. \* $P < 0.05$ , \*\* $P < 0.01$ , \*\*\* $P < 0.001$ .

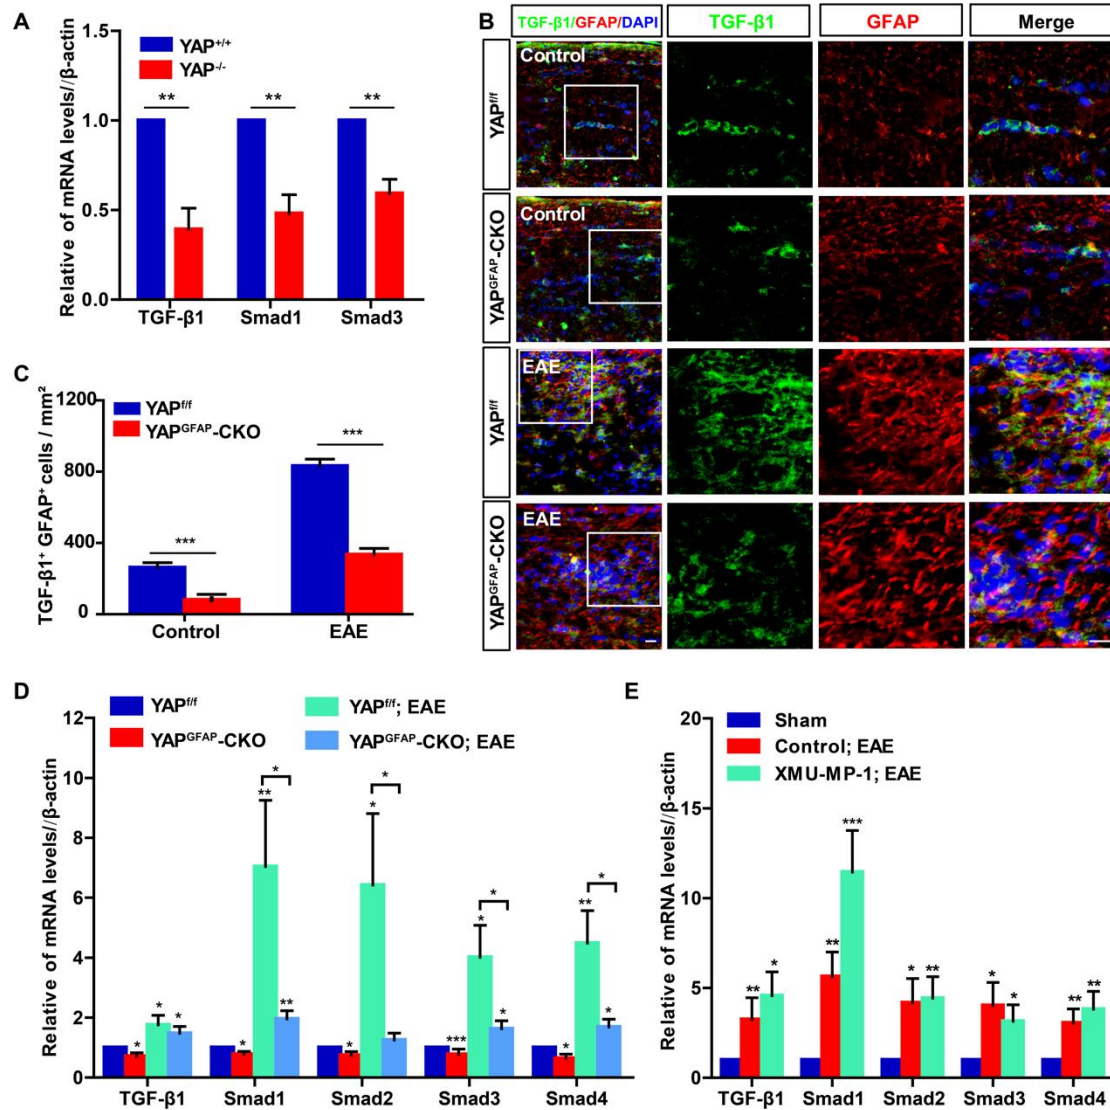

**Figure S5. Analysis of TGF- $\beta$  signaling under various conditions by qPCR and immunostaining.** (A) qPCR analysis of the relative mRNA level of TGF- $\beta$ 1, Smad1 and Smad3 in cultured YAP<sup>+/+</sup> and YAP<sup>-/-</sup> astrocytes (n = 8 per group, normalized to YAP<sup>-/-</sup> group, compared with YAP<sup>-/-</sup> group). (B) Double immunostaining of TGF- $\beta$ 1 (green) and GFAP (red) in the optic nerve of YAP<sup>fl/fl</sup> and YAP<sup>GFAP-CKO</sup> mice, YAP<sup>fl/fl</sup> EAE and YAP<sup>GFAP-CKO</sup> EAE mice. (C) Quantitative analysis of the density of TGF- $\beta$ 1<sup>+</sup> astrocytes as shown in (B) (n = 7 per group, compared with YAP<sup>fl/fl</sup> group). Images of selected regions (white squares) were shown at higher magnification. (D) qPCR analysis of the relative mRNA levels of TGF- $\beta$ 1, Smad1, Smad2, Smad3 and Smad4 in the optic nerve of YAP<sup>fl/fl</sup> and YAP<sup>GFAP-CKO</sup> mice, YAP<sup>fl/fl</sup> EAE and YAP<sup>GFAP-CKO</sup> EAE mice (n = 10 per group, normalized to control group, compared with YAP<sup>fl/fl</sup> group). (E) qPCR analysis of the relative mRNA levels of TGF- $\beta$ 1, Smad1, Smad2, Smad3 and Smad4 in the optic nerve of sham, control-treated and XMU-MP-1-treated EAE mice (n = 7 per group, normalized to sham group, compared with sham group). Data were

mean  $\pm$  SEM, two-way ANOVA with Bonferroni's post-tests, \* $P < 0.05$ , \*\* $P < 0.01$ , \*\*\* $P < 0.001$ . Scale bars, 20  $\mu\text{m}$ .

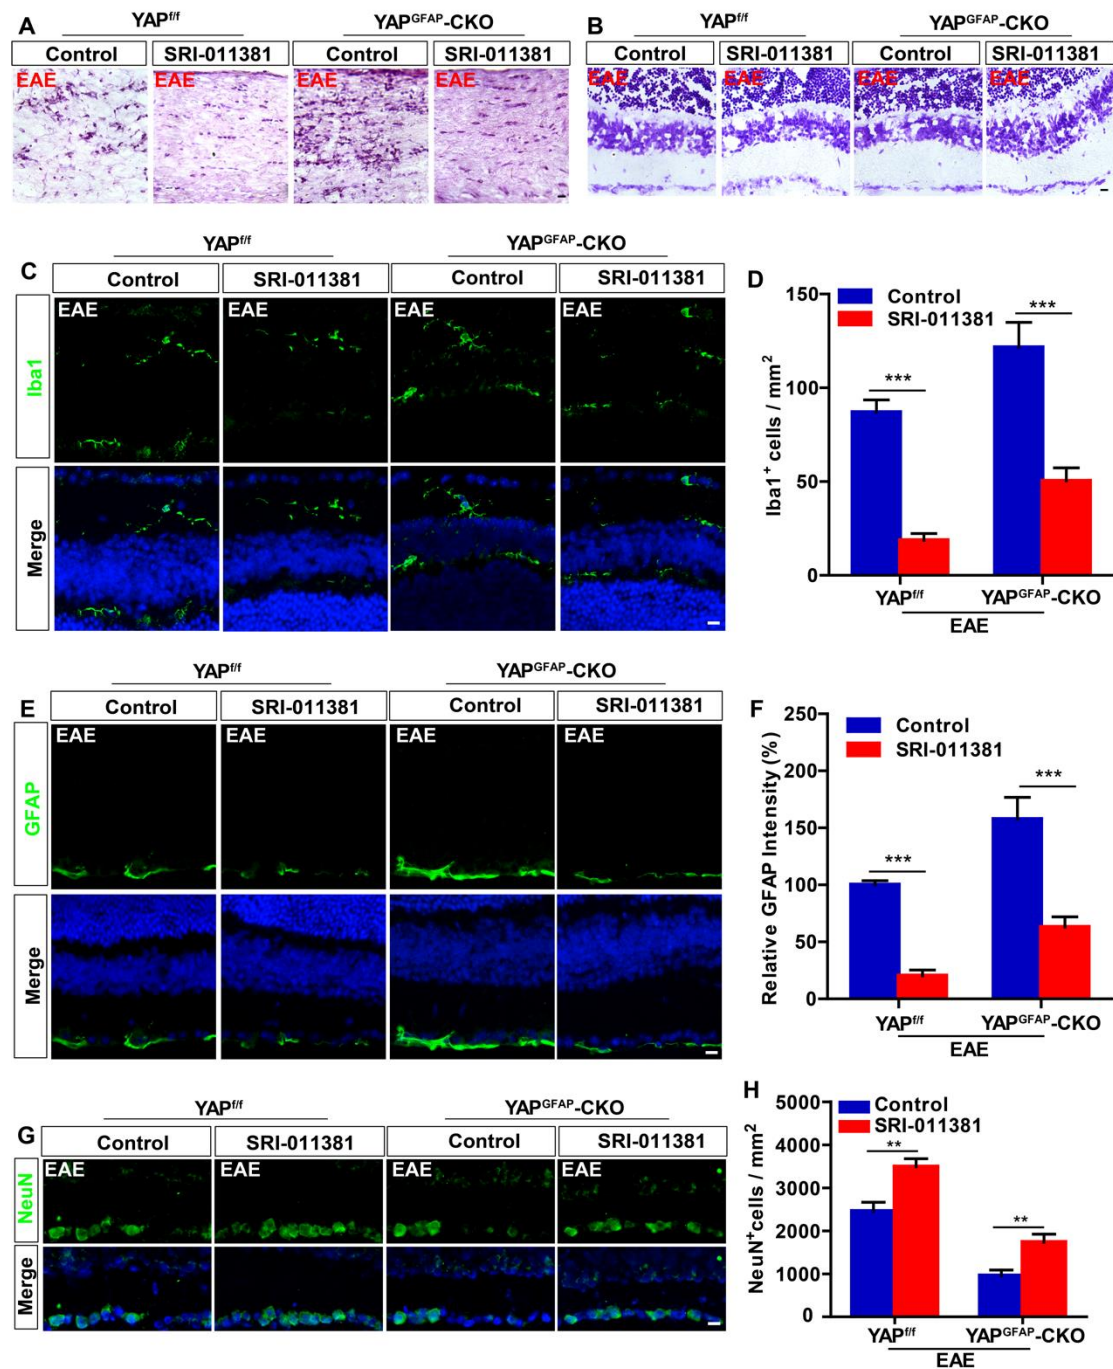

**Figure S6. Activation of TGF- $\beta$  signaling reduced the inflammatory infiltration and demyelination in optic nerve and retina of EAE mice.** (A) HE staining of optic nerve obtained from control-treated YAP<sup>fl/fl</sup> EAE and YAP<sup>GFAP-CKO</sup> EAE mice, SRI-011381-treated YAP<sup>fl/fl</sup> EAE and YAP<sup>GFAP-CKO</sup> EAE mice. (B) Nissl staining of retina obtained from control-treated YAP<sup>fl/fl</sup> EAE and YAP<sup>GFAP-CKO</sup> EAE mice, SRI-011381-treated YAP<sup>fl/fl</sup> EAE and YAP<sup>GFAP-CKO</sup> EAE mice. (C, E, G) Immunostaining of Iba1 (green) (C), GFAP (green) (E) or NeuN (green) (G) in the retina of control-treated YAP<sup>fl/fl</sup> EAE and YAP<sup>GFAP-CKO</sup> EAE mice, SRI-011381-treated YAP<sup>fl/fl</sup> EAE and YAP<sup>GFAP-CKO</sup> EAE mice. (D, H) Quantitative analysis of the density of Iba1<sup>+</sup> cells (D) or NeuN<sup>+</sup> cells (H) as shown in (C, G) (n = 6 per group). (F) Quantitative analysis of

GFAP intensity as shown in (E) (n = 7 per group, normalized to YAP<sup>f/f</sup> group). Data were mean  $\pm$  SEM, two-way ANOVA with Bonferroni's post-tests, compared with control group, \*\* $P < 0.01$ , \*\*\* $P < 0.001$ . Scale bars, 20  $\mu$ m.



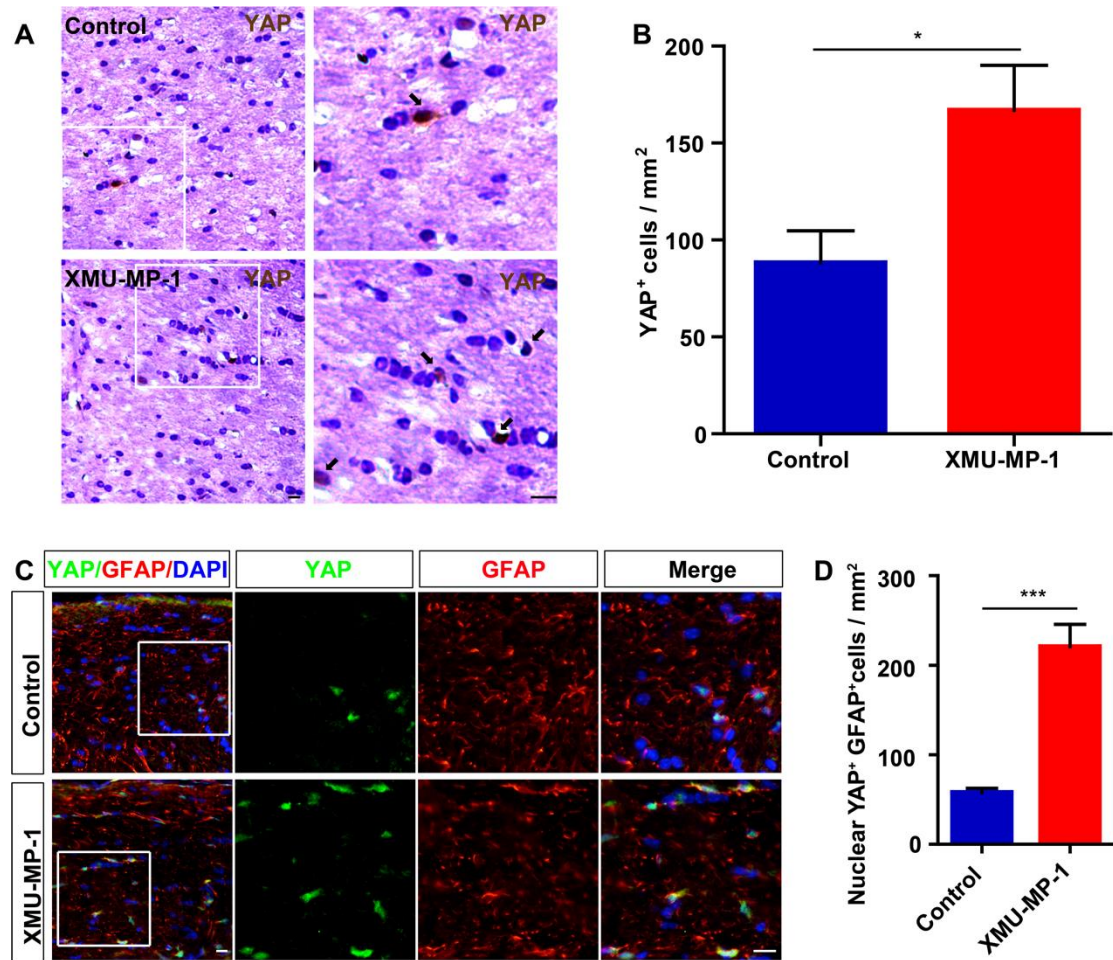

**Figure S7. Activation of YAP in astrocytes of optic nerve by XMU-MP-1.** (A) Immunohistochemistry of YAP in the optic nerve of control and XMU-MP-1-treated 2-month mice. (B) Quantitative analysis of the density of YAP<sup>+</sup> cells as shown in (A) (n = 6 per group). (C) Double immunostaining of YAP (green) and GFAP (red) in the optic nerve of control and XMU-MP-1-treated 2-month mice. (D) Quantitative analysis of the density of nuclear YAP<sup>+</sup> astrocytes as shown in (C) (n = 7 per group). Images of selected regions (white squares) were shown at higher magnification. Data were mean ± SEM, Student's t-test, compared with control mice, \**P* < 0.05, \*\*\**P* < 0.001. Scale bars, 20 μm.
